# Supplementary material
Source: PubMed Central journal article supplement (PMC3397865)

**PKC $\alpha$  and Src-kinase support human prostate-distributed dihydrotestosterone-metabolizing UDP- glucuronosyltransferase-2B15 activity**

**Sunit K. Chakraborty\***, **Nikhil K. Basu\***, **Sirsendu Jana**, **Mousumi Basu**, **Amit Raychoudhuri** and **Ida S. Owens<sup>‡</sup>**

**Figure Legends**

Fig. 1S (A) Effect of different concentrations of Calphostin-C on 2B15 activity expressed in COS-1 cells. Seventy hr after transfection with pSVL-UGT2B15 with the last 12 hr in phosphate-free medium, cells were treated with increasing concentrations of calphostin-C between 25 and 500nM for 2 hr. 2B15 glucuronidation of either DHT and 3 $\alpha$ -diol was carried out at 37°C for 6 hr. Western blot analysis was carried out with anti-UGT-1168 and anti- $\beta$ -actin as described under Experimental Procedures. Data represent 3 experiments with standard errors of  $\pm 2-6\%$ . (B) Effects of select PKC inhibitors on UGT2B15 expressed in COS-1 cells. Seventy hr after transfection with the pSVL-UGT2B15 construct with the last 12 hr in phosphate-free medium, COS-1 cells were treated with select PKC inhibitors: 250 nM BIM (Bis-indolemaleimide), 1.0  $\mu$ M Gö6976 or 10  $\mu$ M Rottlerin for 2 hr before harvesting. Homogenates were assayed in vitro using DHT or ADT DIOL. Western blot analysis was carried out with anti-UGT-1168 and anti- $\beta$ -actin as described. Data represent 3 experiments with standard errors of  $\pm 2-4\%$ .

Fig. 2S Effect of phorbol myristate acetate (PMA) on 2B15 expressed in COS-1 Cells. Seventy hr after transfection with pSVL-UGT2B15, COS-1 cells were treated with 100 or 250 nM PMA that continued for one hr. Upon harvesting cells, homogenates were assayed in vitro for glucuronidation of DHT (shown) or ADT DIOL. Western blot analysis was carried out with anti-UGT-1168 and anti- $\beta$ -actin as described under Methods. Data represent 3 experiments with standard errors of  $\pm 2-6\%$ .

Fig. 3S Effect of Src activator, 1, 25 di-hydroxy-vitamin D3, on UGT2B15 expressed in COS-1 cells. Seventy two hr after transfection in COS-1 cells with pSVL-UGT2B15, 1,25 di-hydroxy-vitamin D3 was added as described in Experimental Procedures. Cells were harvested, stored and assayed using DHT (shown) and ADT DIOL. Western blot analysis was carried out with anti-UGT-1168, anti-Src and anti- $\beta$ -actin as described Experimental Procedures. Data represent 3 experiments with standard errors of  $\pm 2-6\%$

**A** Effect of Calphostin-C on UGT2B15 activity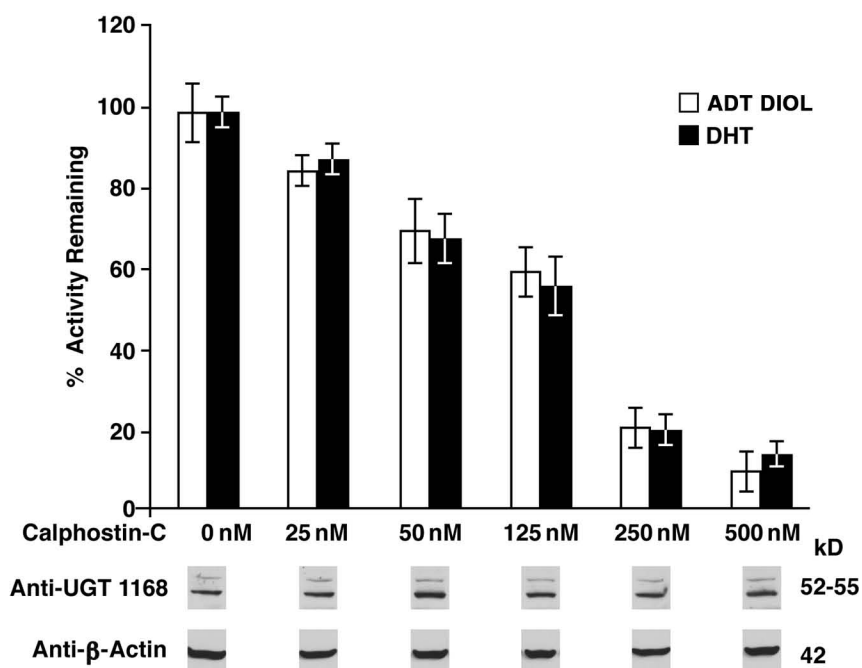**B** Effect of PKC Inhibitors on UGT2B15 activity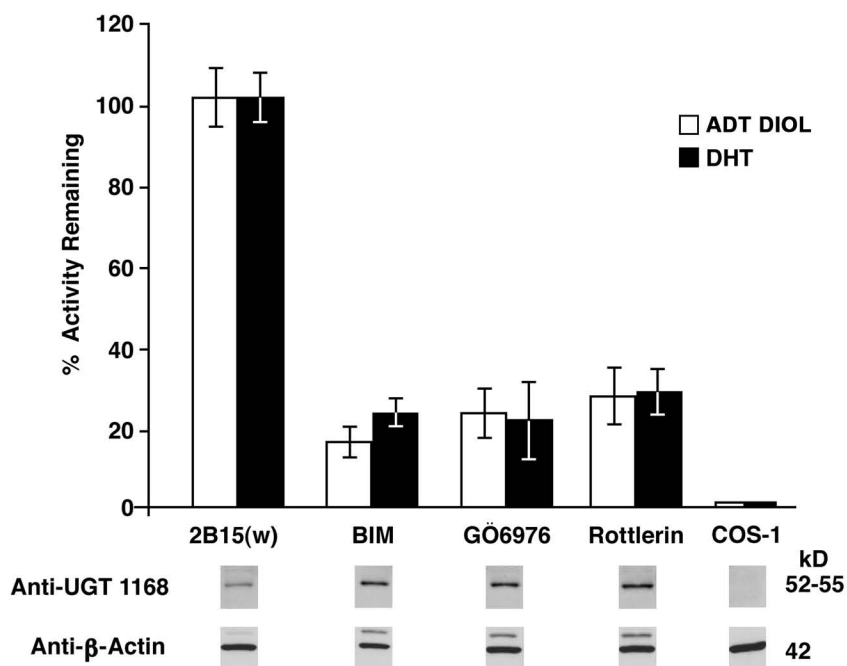

## Effect of PMA on UGT2B15 activity

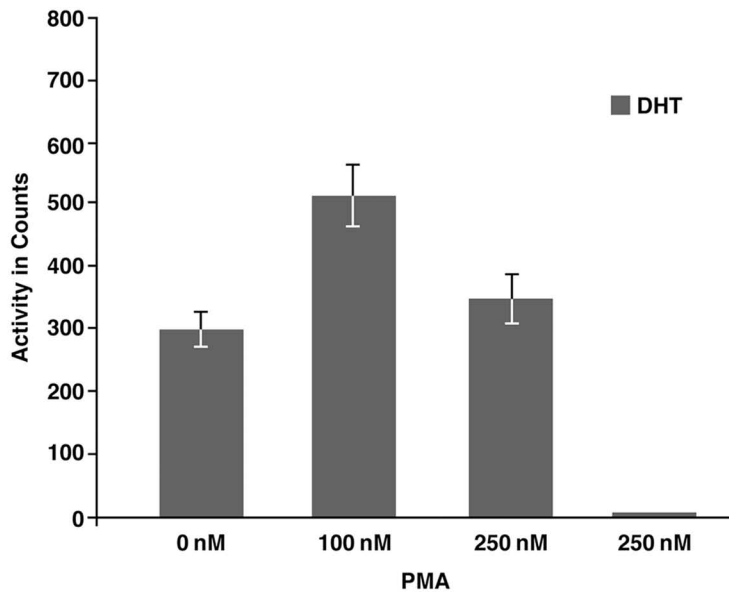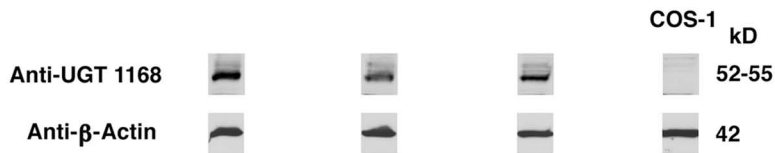

### Effect of Vitamin D treatment on UGT2B15 activity

Substrate: DHT

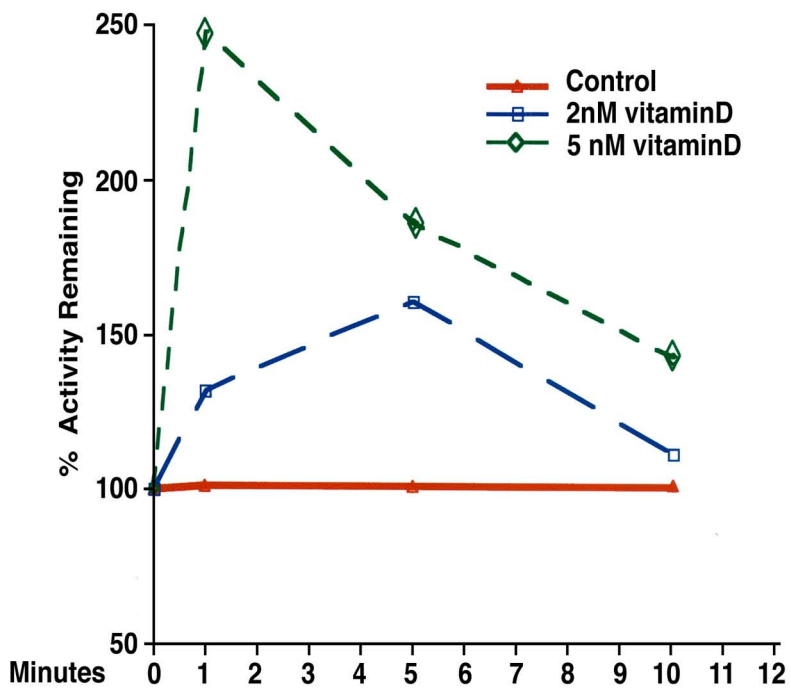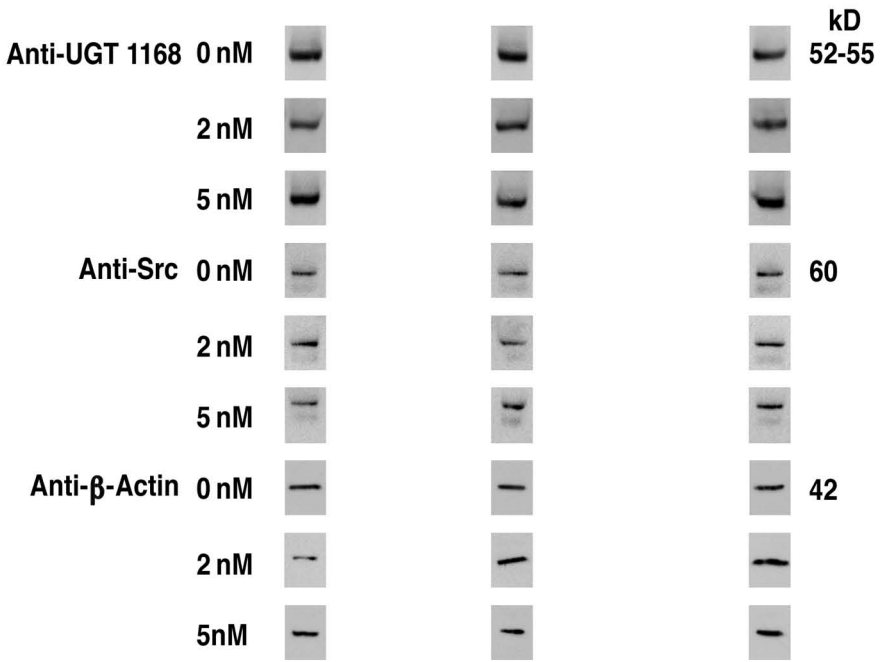

Supplement: supp_M111.335067_suppdata.pdf [file supp_M111.335067_suppdata.pdf]
